# Supplementary material
Source: MDPI journal article supplement (https://www.mdpi.com/2073-4344/13/4/650)
Supplement: s1 [file s1]

Supplementary Materials

# Ultrasound-Assisted 1,3-Dipolar Cycloadditions Reaction Utilizing Ni-Mg-Fe LDH: A Green and Sustainable Perspective

Mohamed Abdel Salam <sup>1</sup>, Eman Saleem Imdadulhaq <sup>1</sup>, Abeer Nasser Al-Romaizan <sup>1</sup>, Tamer S. Saleh <sup>2,\*</sup> and Mohamed Mokhtar M. Mostafa <sup>1,\*</sup>

<sup>1</sup> Chemistry Department, Faculty of Science, King Abdulaziz University, P.O. Box 80203, Jeddah 21589, Saudi Arabia

<sup>2</sup> Chemistry Department, College of Science, University of Jeddah, P.O. Box 80329, Jeddah 21589, Saudi Arabia

\* Correspondence: tssayed@uj.edu.sa (T.S.S.); mmoustafa@kau.edu.sa (M.M.M.M.)

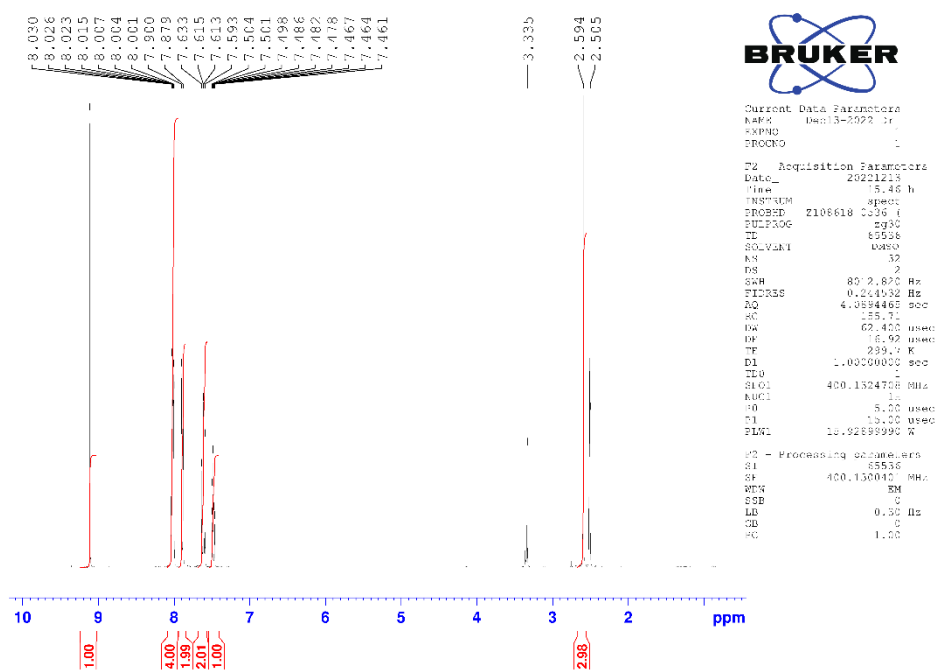

Figure S1. <sup>1</sup>H NMR of compound 5a.

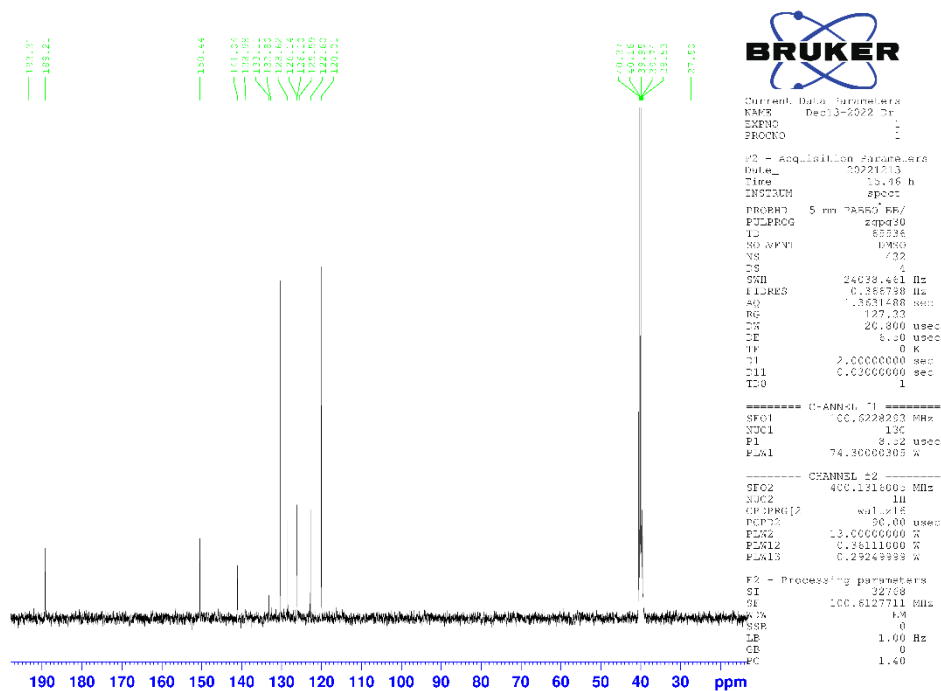Figure S2.  $^{13}\text{C}$  NMR of compound 5a.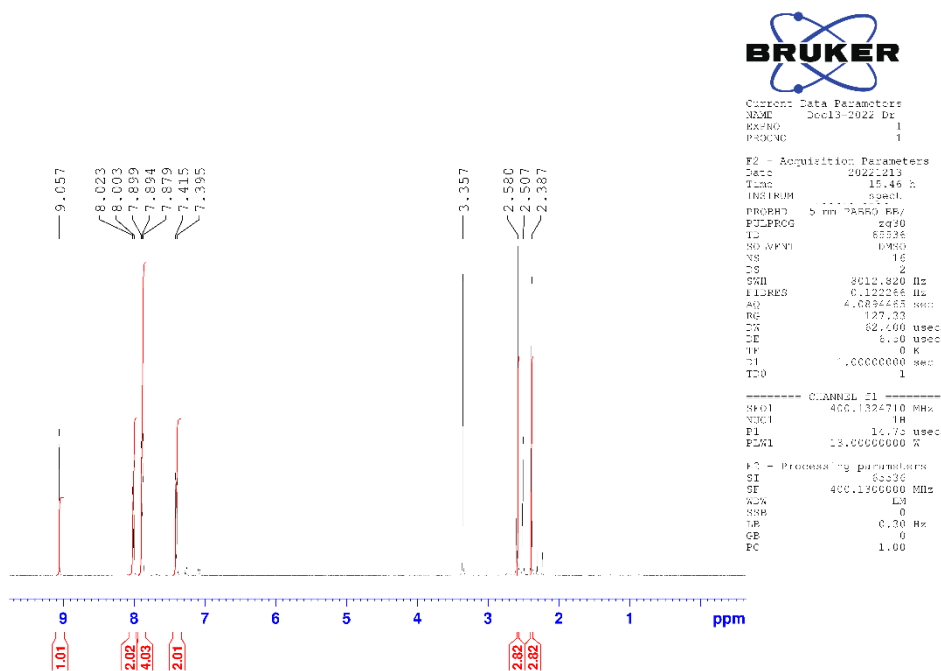Figure S3.  $^1\text{H}$  NMR of compound 5b.

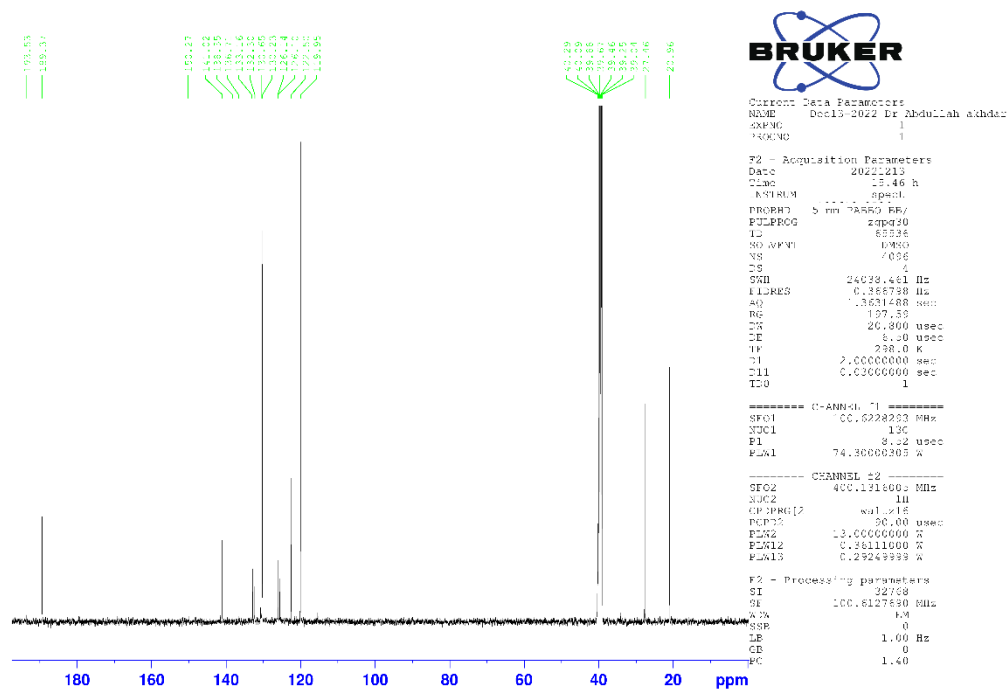Figure S4.  $^{13}\text{C}$  NMR of compound 5b.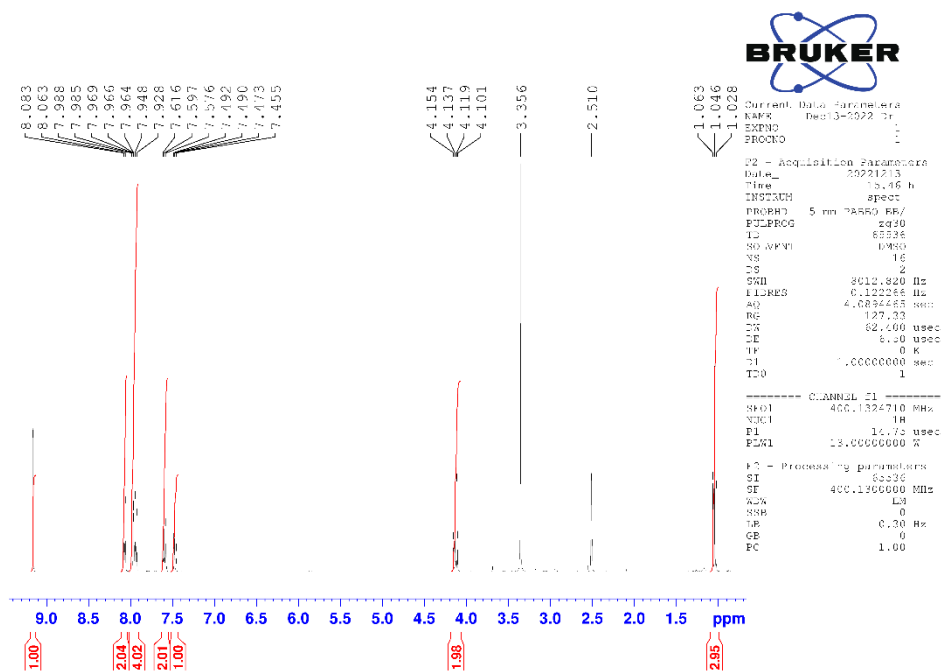Figure S5.  $^1\text{H}$  NMR of compound 5c.

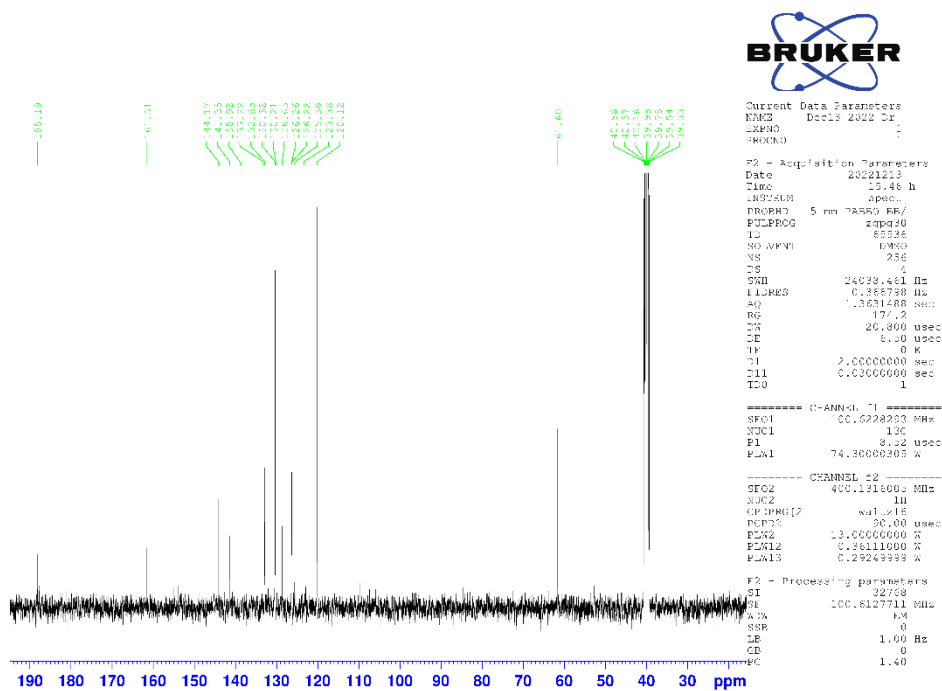Figure S6.  $^{13}\text{C}$  NMR of compound 5c.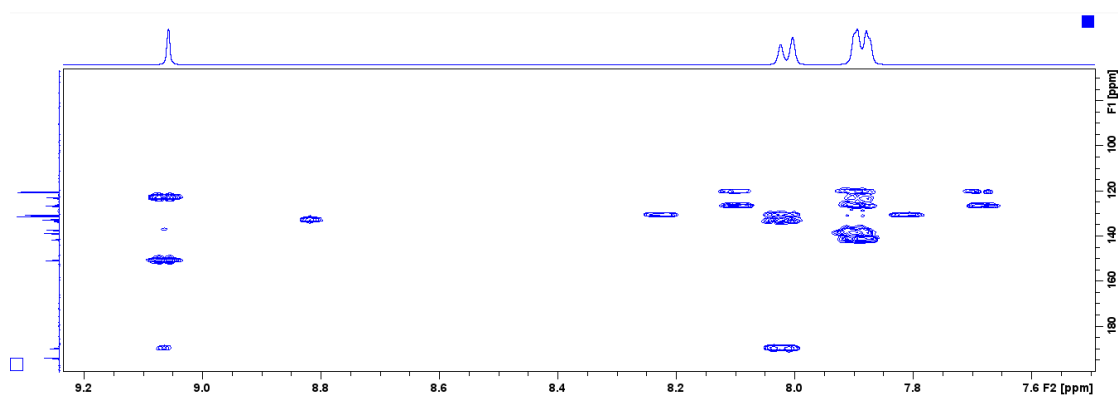Figure S7.  $^1\text{H}$ - $^{13}\text{C}$ -HMBC NMR that show one correlation between the pyrazole proton towards one carbonyl only.
